# Supplementary material for: Forecasting virus outbreaks with social media data via neural ordinary differential equations
Source: Springer Nature journal article supplement (doi:10.1038/s41598-023-37118-9), 2023-07-05
Supplement: 41598_2023_37118_MOESM1_ESM.pdf [file 41598_2023_37118_MOESM1_ESM.pdf]

## **Supplementay Material.**

Title:

*Forecasting virus outbreaks with social media data via neural ordinary differential equations*

Authors:

*Matías Nuñez, Nadia L. Barreiro, Rafael A. Barrio and Christopher Rackauckas*

The full survey can be found in the following link:

<https://cmu-delphi.github.io/delphi-epidata/symptom-survey/coding.html#wave-1>

The extracted signals from the survey data are updated daily and can be seen here: <https://delphi.cmu.edu/covidcast/survey-results/?date=20210124>

An interactive map with all the signals can be seen here

<https://delphi.cmu.edu/covidcast/>

The following is an extract of the survey questions from which the signal where constructed.

# Survey of COVID-Like Illness - US Expansion

---

## Start of Block: Screener

You must be 18 years or older to take this survey. Are you 18 years or older?

Yes (1)

No (2)

---

## Start of Block: Section A: Symptoms (forecast)

A1 In the past 24 hours, have **you or anyone in your household** experienced any of the following:

|                             | Yes (1)               | No (2)                |
|-----------------------------|-----------------------|-----------------------|
| Fever (100°F or higher) (1) | <input type="radio"/> | <input type="radio"/> |
| Sore throat (2)             | <input type="radio"/> | <input type="radio"/> |
| Cough (3)                   | <input type="radio"/> | <input type="radio"/> |
| Shortness of breath (4)     | <input type="radio"/> | <input type="radio"/> |
| Difficulty breathing (5)    | <input type="radio"/> | <input type="radio"/> |

A2 How many people in your household (**including&nbsp;yourself**) are **sick (fever, along with at least one other symptom** from the above list)?

A2b How many people are there in your household **in total (including yourself)**?

A3 What is your current ZIP code?

A4 How many **additional** people in your local community that you know personally are **sick (fever, along with at least one other symptom** from the above list)?

---

## Start of Block: Section B: Symptoms (non-forecast)

B2 The rest of the survey will go into more detail to get a better understanding of your personal experience.

**In the past 24 hours**, have **you personally** experienced any of the following symptoms? (Select all that apply.)

- Fever (1)
  - Cough (2)
  - Shortness of breath (3)
  - Difficulty breathing (4)
  - Tiredness or exhaustion (5)
  - Nasal congestion (6)
  - Runny nose (7)
  - Muscle or joint aches (8)
  - Sore throat (9)
  - Persistent pain or pressure in your chest (10)
  - Nausea or vomiting (11)
  - Diarrhea (12)
  - Loss of smell or taste (13)
  - Other (Please specify): (14)
- 
- None of the above (15)

B2b How long, in days, have you been experiencing these symptoms?

B3 You mentioned that you had a fever **in the past 24 hours**. Have you taken your temperature?

- Yes (1)
- No (2)

Q40 What was your highest temperature, in °F?

B4 You mentioned that you experienced a cough **in the past 24 hours**. Did you cough up mucus?

- Yes, I had a lot of mucus (1)
- Yes, I had a little mucus (2)
- No, I had a dry cough (3)

B5 Have you been tested for COVID-19 (coronavirus) for your current illness?

- Yes, I was tested, and received a positive diagnosis for COVID-19 (1)
- Yes, I was tested, but it was negative for COVID-19 (2)
- Yes, I was tested, but have not received the result (3)
- No, I tried to get tested but could not get a test (4)
- No, I have not tried to get tested (5)

B6 **In the past 24 hours**, have you been to the hospital to seek care for your current illness?

- Yes (1)
- No (2)
- I have tried, but been unable to receive care (3)

Start of Block: Section C: Contacts and risk factors

C1

Have you ever been told by a doctor, nurse, or other health professional that you have any of the following medical conditions?

(Please select all that apply)

- Diabetes (1)
- Cancer (other than skin cancer) (2)
- Heart disease (3)
- High blood pressure (4)
- Asthma (5)
- Chronic lung disease such as COPD or emphysema (6)
- Kidney disease (7)
- Autoimmune disorder such as rheumatoid arthritis or Crohn's disease (8)
- None of the above (9)

C2 Have you had a flu shot in the last 12 months?

- Yes (1)
- No (2)

C3 **In the past 5 days**, have you gone to work outside of your home?

- Yes (1)
- No (2)

**C4 In the past 5 days**, have you worked or volunteered in a hospital, medical office, ambulance service, first responder services, or any other health care setting?

- Yes (1)
- No (2)

**C5 In the past 5 days**, have you worked at or visited a long-term care facility or nursing home?

- Yes (1)
- No (2)

**C6 In the past 5 days**, have you traveled outside of your state?

- Yes (1)
- No (2)

**C7** To what extent are you intentionally avoiding contact with other people?

- All of the time (1)
- Most of the time; I only leave my home to buy food and other essentials (2)
- Some of the time; I have reduced the amount of times I am in public spaces, social gatherings, or at work (3)
- None of the time (4)

**C8 In the past 5 days**, how often have you ...

|                                              | None of the time<br>(1) | Some of the<br>time (2) | Most of the time<br>(3) | All the time (4)      |
|----------------------------------------------|-------------------------|-------------------------|-------------------------|-----------------------|
| felt nervous,<br>anxious, or on<br>edge? (1) | <input type="radio"/>   | <input type="radio"/>   | <input type="radio"/>   | <input type="radio"/> |
| felt depressed?<br>(2)                       | <input type="radio"/>   | <input type="radio"/>   | <input type="radio"/>   | <input type="radio"/> |

C9 How do you feel about the possibility that you or someone in your immediate family might become seriously ill from COVID-19 (coronavirus disease)?

- Very worried (1)
- Somewhat worried (2)
- Not too worried (3)
- Not worried at all (4)

C10 **In the past 24 hours**, with how many people have you had direct contact, **outside of your household**? Your best estimate is fine. ["Direct contact" means: a conversation lasting more than 5 minutes with a person who is closer than 6 feet away from you, or physical contact like hand-shaking, hugging, or kissing.]

|                                                 | Number (1) |
|-------------------------------------------------|------------|
| At work (1)                                     |            |
| Shopping for groceries and other essentials (2) |            |
| At social gatherings (3)                        |            |
| Other (4)                                       |            |

C11 **In the past 24 hours**, have you had direct contact with anyone who recently tested positive for COVID-19 (coronavirus)?["Direct contact" means: a conversation lasting more than 5 minutes with a person who is closer than 6 feet away from you or physical contact like hand-shaking, hugging, or kissing.]

Yes (1)

Not to my knowledge (2)

C12 Was this person a member of your household?

Yes (1)

No (2)



## Start of Block: Demographics

A3b In which state are you currently staying?

- Alabama (1)
- Alaska (2)
- Arizona (3)
- Arkansas (4)
- California (5)
- Colorado (6)
- Connecticut (7)
- Delaware (8)
- District of Columbia (9)
- Florida (10)
- Georgia (11)
- Hawaii (12)
- Idaho (13)
- Illinois (14)
- Indiana (15)
- Iowa (16)
- Kansas (17)
- Kentucky (18)
- Louisiana (19)
- Maine (20)
- Maryland (21)

- Massachusetts (22)
- Michigan (23)
- Minnesota (24)
- Mississippi (25)
- Missouri (26)
- Montana (27)
- Nebraska (28)
- Nevada (29)
- New Hampshire (30)
- New Jersey (31)
- New Mexico (32)
- New York (33)
- North Carolina (34)
- North Dakota (35)
- Ohio (36)
- Oklahoma (37)
- Oregon (38)
- Pennsylvania (39)
- Puerto Rico (40)
- Rhode Island (41)
- South Carolina (42)

- South Dakota (43)
- Tennessee (44)
- Texas (45)
- Utah (46)
- Vermont (47)
- Virginia (48)
- Washington (49)
- West Virginia (50)
- Wisconsin (51)
- Wyoming (52)
- I do not reside in the United States (53)

D1 What is your gender?

- Male (1)
- Female (2)
- Non-binary (3)
- Prefer to self-describe: (4) \_\_\_\_\_
- Prefer not to answer (5)

D1b Are you currently pregnant?

- Yes (1)
- No (2)
- Prefer not to answer (3)
- Not applicable (4)

D2 What is your age?

- 18-24 years (1)
- 25-34 years (2)
- 35-44 years (3)
- 45-54 years (4)
- 55-64 years (5)
- 65-74 years (6)
- 75 years or older (7)

D3 How many children **under 18 years old** currently stay in your household?

D4 How many adults **between 18 and 64 years old** currently stay in your household (not including yourself)?

D5 How many adults 65 years old or older currently stay in your household (not including yourself)?

Q36 How much of a threat would you say the coronavirus outbreak is to your household's finances?

- A substantial threat (1)
- A moderate threat (2)
- Not much of a threat (3)
- Not a threat at all (4)
